# Supplementary material for: Development of a Multifunctional Edible Coating and Its Preservation Effect on Sturgeon (Acipenser baeri♀× Acipenser schrenckii♂) Fillets during Refrigerated Storage at 4 °C
Source: MDPI journal article supplement (doi:10.3390/foods11213380), 2022-10-27
Supplement: s1 [file s1]

## **Supplementary file**

### **1. Determination of minimum inhibitory concentration (MIC)**

The 64 mg/mL tea polyphenol solution,  $\epsilon$ -polylysine solution and chitosan solution were prepared by using sterile water. After filtration with a 0.45  $\mu\text{m}$  sterile filter membrane, 2-fold serial dilution with Tryptone Soy Broth (TSB) to obtain a series of different concentration solutions. The specific spoilage organism *Aeromonas sobria* LT-101 was inoculated in TSB medium and cultured with shaking at 30 °C for 12 h, the final concentration adjusted to  $10^6$  CFU/mL. Then 180  $\mu\text{L}$  of bacterial solution and 20  $\mu\text{L}$  of tea polyphenols, chitosan, and  $\epsilon$ -polylysine solutions of different concentrations were added to 96-well plates, and incubated at 30 °C for 24 h. The absorbance value at 600 nm was measured by using a microplate reader. The lowest concentration that inhibited bacterial growth was taken as the MIC of each antibacterial agent.

### **2. The effect of different concentrations of antibacterial agents on *A. sobria* LT-101**

Taking 40 mL of fish juice into 100 mL conical flasks, added 100  $\mu\text{L}$  of the bacterial solution ( $10^6$  CFU/mL), and then added a certain concentration of tea polyphenols,  $\epsilon$ -polylysine, or chitosan. The final concentration of antibacterial agents in fish juice range from 0 to 4 mg/mL. The total viable counts were determined after being shaken and cultured at 140 rpm in an incubator at 30 °C for 24 h. Three replicates were performed for each concentration.

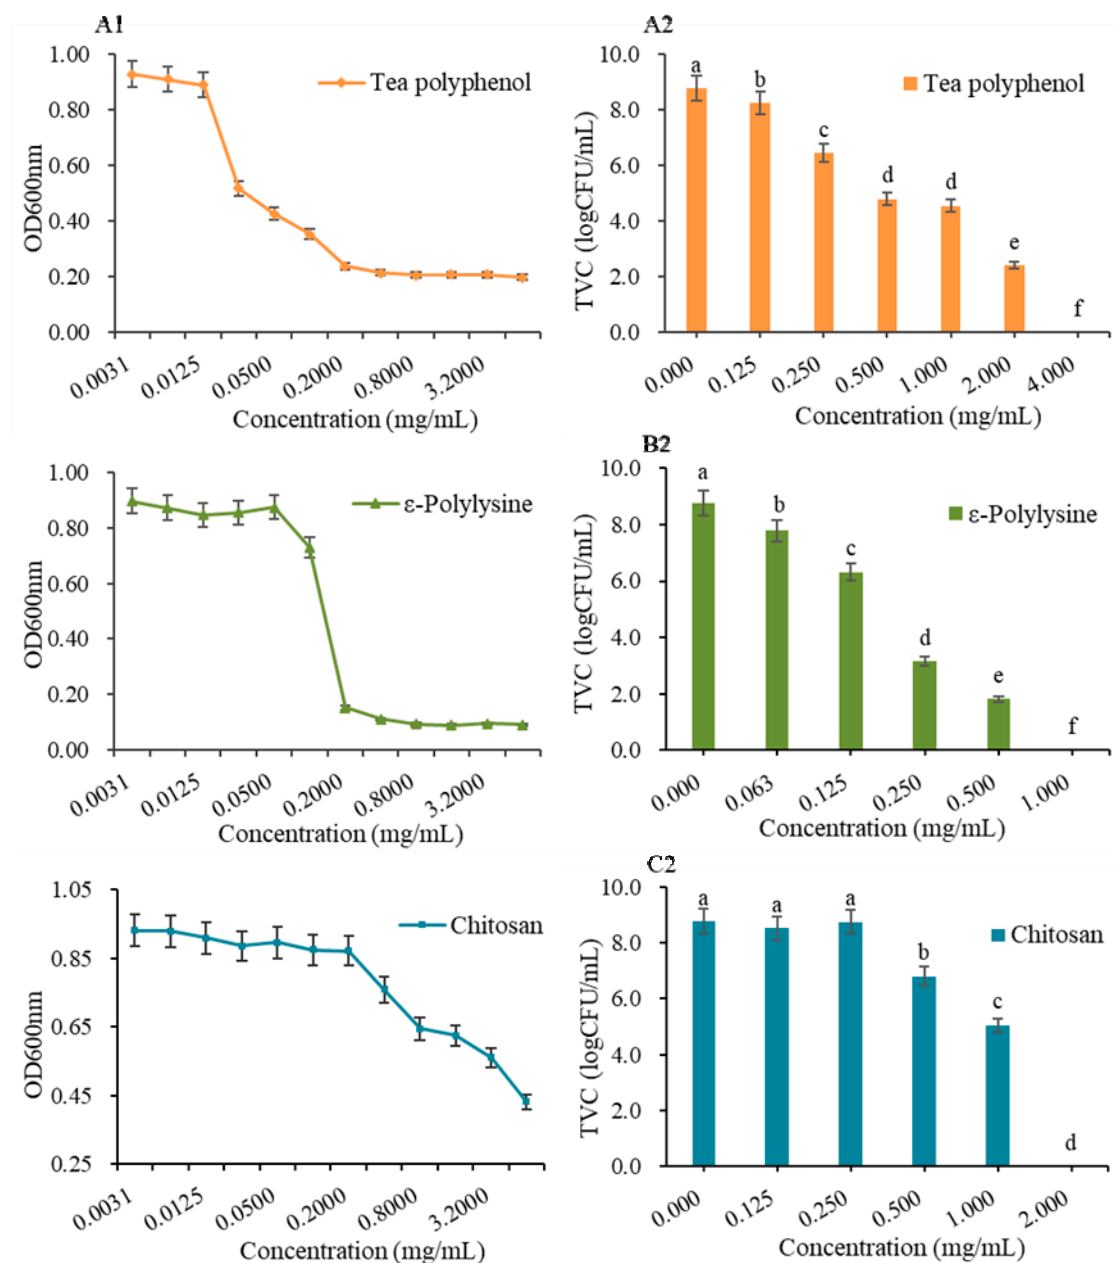

**Figure S1.** Inhibitory effect of different concentrations of preservatives on specific spoilage organisms *Aeromonas sobria* LT-101.
